# Supplementary material for: Dynamic topological remodeling underlies assembly of the flagellar protein-export channel complex
Source: Research Square preprint supplement (doi:10.21203/rs.3.rs-8450974/v1), 2026-01-06
Supplement: Supplementary file 1 [file a074a4398c2423e5d9bdf78c.docx]

**Supplementary Information**

**Dynamic topological remodeling underlies assembly of**

**the flagellar protein-export channel complex**

**Miki Kinoshita, Akihiro Kawamoto, Keiichi Namba, Tohru Minamino**

**
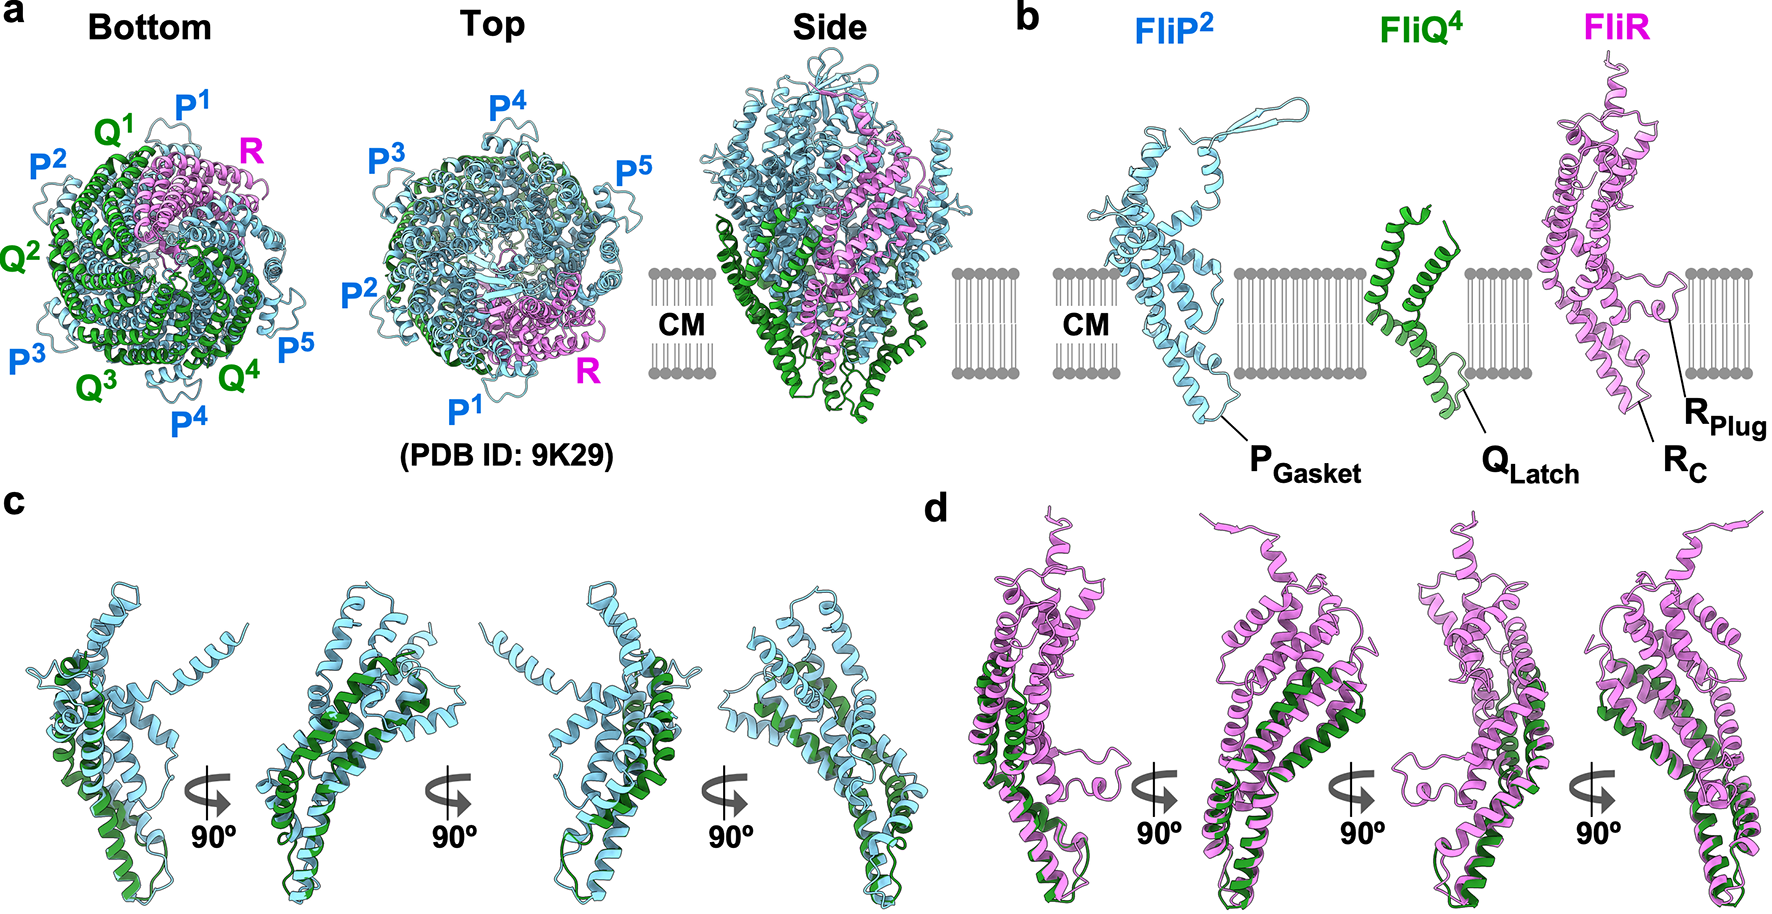
**

**Supplementary Fig. 1. The cryo-EM structure of the FliPQR complex. (a)** Cα ribbon diagram of the atomic model of the FliPQR complex with a stoichiometry of 5 FliP, 4 FliQ, and 1 FliR subunits (PDB ID: 9K29). The five FliP subunits assemble into a helical array, with the first FliP subunit (FliP1) at the top and FliP2–FliP5 following a descending spiral. FliR inserts between FliP1 and FliP5. The FliQ subunit that directly associates with FliR is designated as the first FliQ subunit (FliQ1). The remaining subunits, arranged along the helical staircase, are subsequently referred to as the second (FliQ2), third (FliQ3), and fourth (FliQ4) subunits. **(b)** The cryo-EM structure of FliP2 (sky blue), FliQ4 (forest green), FliR subunit (orchid). The PGasket, QLatch, RC, and FliRPlug loops tightly close the cytoplasmic gate of the FliPQR protein-export channel. The PGasket and FliRPlug loops also suppress the leakage of small molecules during the translocation of export substrates through the export channel. **(c)** Structural comparison between FliP and FliQ. FliP1 was superimposed onto FliQ1 with root-mean-square deviation (RMSD) of 1.162 Å. **(d)** Structural comparison between FliR and FliQ.FliR was superimposed onto FliQ1 with RMSD of 1.255 Å.

**
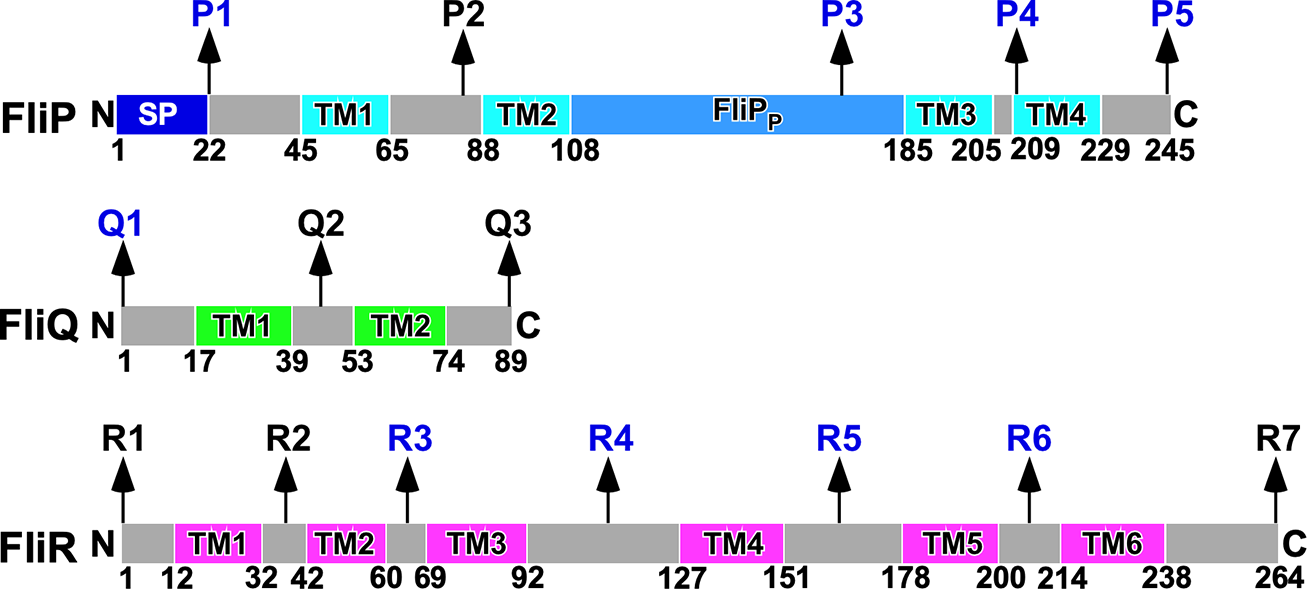
**

**Supplementary Fig. 2. Topology predictions of FliP, FliQ, and FliR.** The N-terminal 21 residues of FliP serve as a cleavable signal peptide (SP). FliP, FliQ, and FliR are predicted to contain four (TM1–TM4), two (TM1 and TM2), and six (TM1–TM6) transmembrane helices, respectively. Five (P1–P5), three (Q1–Q3), and seven (R1–R7) PhoA fusions were generated for FliP, FliQ, and FliR, respectively, to analyze membrane topologies of these three membrane proteins in this study.

**
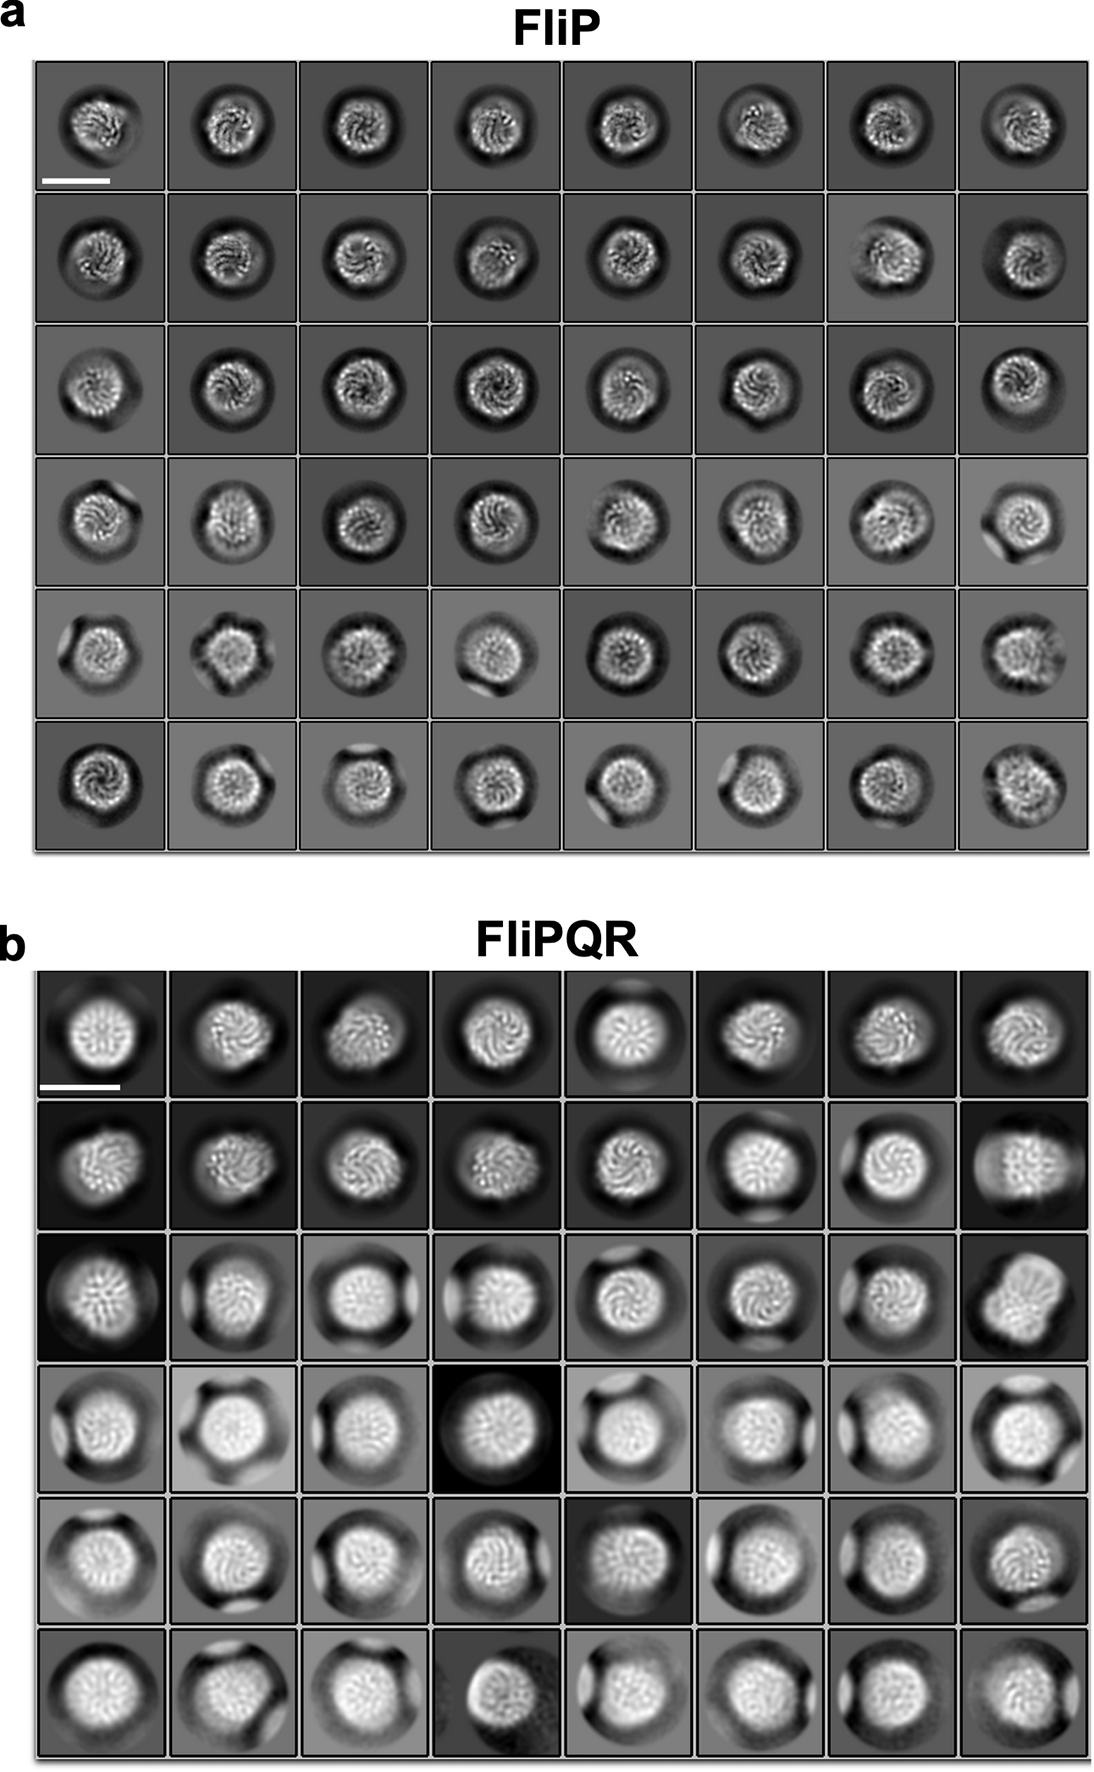
**

**Supplementary Fig. 3. Representative 2D class averages of (a) the FliP complex and (b) the FliPQR complex obtained from single particle cryo-EM image analysis.** Scale bar, 10 nm.

**Supplementary Fig. 4. Model of the FliP homo-hexamer based on the cryo-EM structure of the FliPQR complex (PDB ID: 9K29).** The Val-46 residue of the N-terminal α-helix of the first FliP subunit (FliP1) forms strong hydrophobic contact with the Trp-9 and Leu-10 resides of the N-terminal α-helix of FliR (left panel) but not with the N-terminal region of the sixth FliP subunit (FliP6) (right panel). Furthermore, the β-hairpin of the second FliP subunit (FliP2) forms an antiparallel β-sheet with the N-terminal β1 st
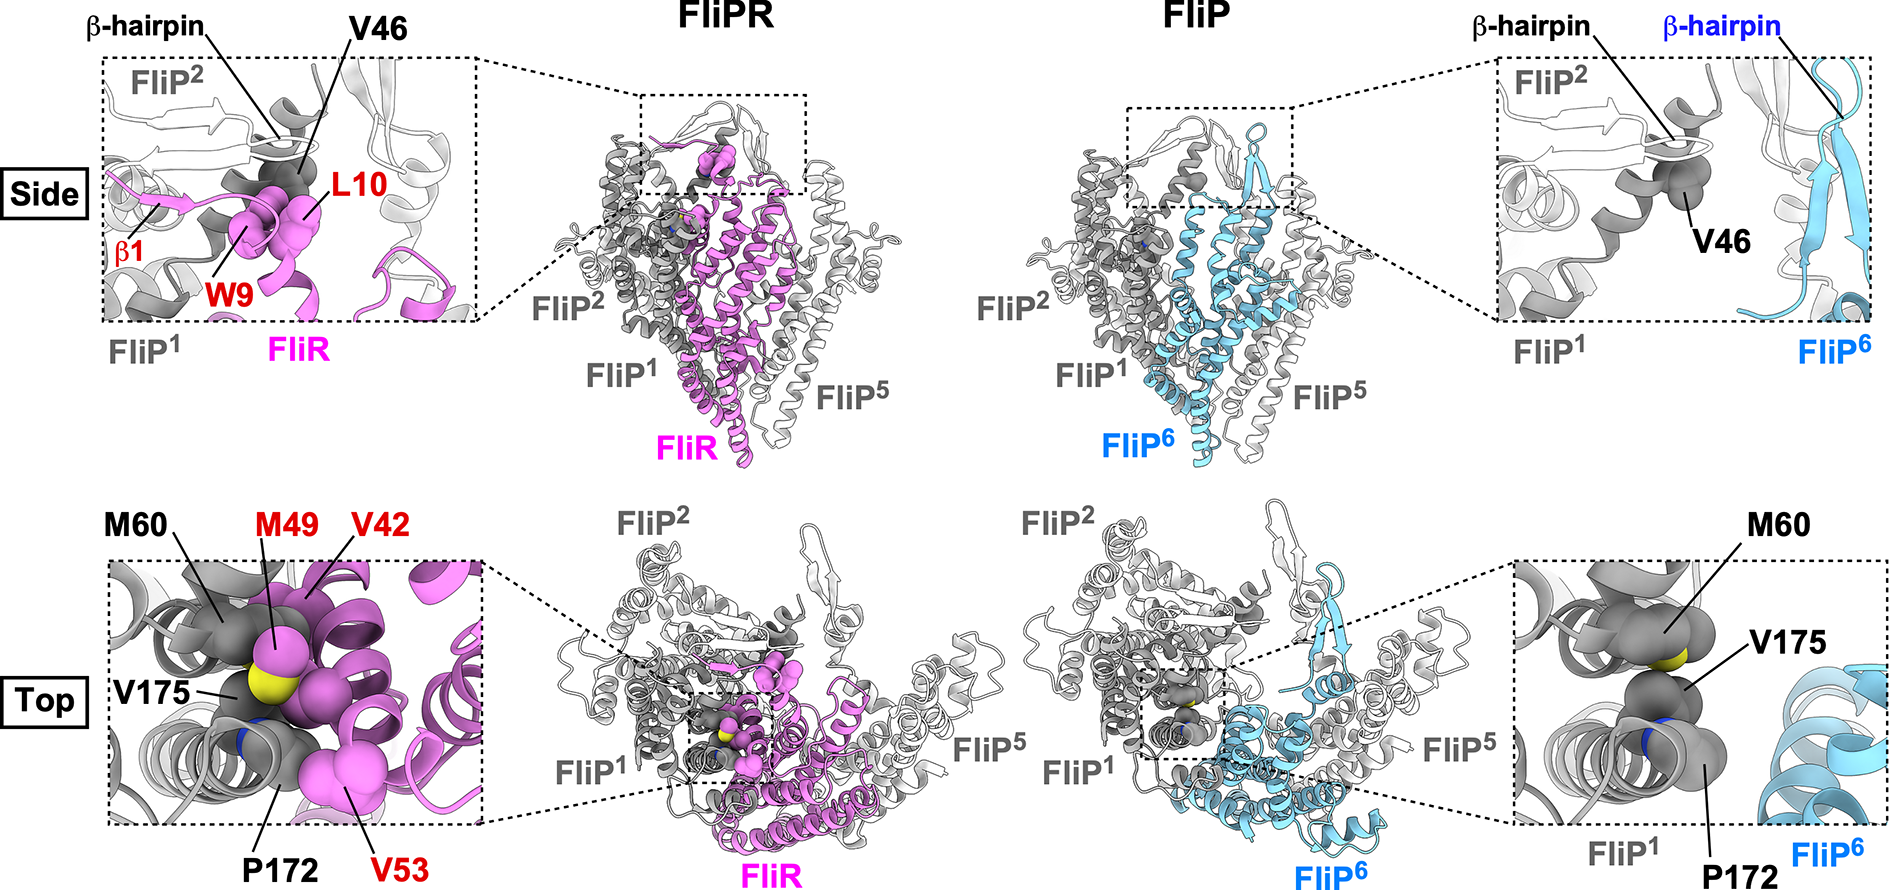
rand of FliR (left panel), but not with the β-hairpin of FliP6 (right panel). **(Lower panels)** The Met-60, Pro-172, and Val-175 residues of FliP1 forms strong hydrophobic contact with the Val-42, Met-49, and Val-53 resides of FliR (left panel) but not with FliP6 (right panel).

**Supplementary Table 1. Locations of the secondary structures in the FliP, FliQ, and FliR subunits in the assembled FliPQR complex (PDB ID: 9K29).**

|  | FliP | | | | |
| --- | --- | --- | --- | --- | --- |
|  | FliP1  (38–245) | FliP2  (22–245) | FliP3  (22–245) | FliP4  (22–245) | FliP5  (22–245) |
| Signal sequence |  |  |  |  |  |
| β1 | – | 25–29 | 25–29 | 25–29 | 26–29 |
| β2 | – | 36–40 | 36–40 | 36–40 | 36–40 |
| α1a | 39–53 | 42–50 | 42–52 | 42–52 | 42–51 |
| α1b | 56–61 | 54–61 | 54–61 | 54–61 | 54–61 |
| α2 | 64–78 | 64–78 | 64–78 | 64–78 | 64–78 |
| α3a | 86–100 | 86–100 | 86–100 | 86–100 | 86–100 |
| α3b | 102–111 | 102–111 | 102–111 | 102–111 | 102–111 |
| α3c | 113–117 | 113–117 | 113–117 | 113–117 | 113–117 |
| α4a | 123–130 | 123–130 | 123–130 | 123–130 | 123–130 |
| α4b | 132–141 | 132–141 | 132–141 | 132–141 | 132–141 |
| α4c | 144–154 | 144–154 | 144–154 | 144–154 | 144–154 |
| α5 | 167–207 | 167–207 | 167–207 | 167–207 | 167–207 |
| α6a | 214–229 | 214–229 | 214–229 | 214–229 | 214–229 |
| α6b | 231–245 | 231–245 | 231–245 | 231–245 | 231–245 |

| FliQ | | | | |
| --- | --- | --- | --- | --- |
|  | FliQ1  (1–89) | FliQ2  (1–89) | FliQ3  (1–89) | FliQ4  (1–89) |
| α1a | 3–20 | 3–20 | 3–20 | 3–20 |
| α1b | 22–41 | 22–41 | 22–41 | 22–41 |
| α2a | 51–64 | 51–64 | 51–64 | 51–64 |
| α2b | 66–88 | 66–88 | 66–88 | 66–88 |

|  | FliR (1–262) |
| --- | --- |
| β1 | 2–4 |
| α1a | 8–15 |
| α1b | 17–28 |
| α2 | 40–55 |
| α3a | 68–88 |
| α3b | 90–106 |
| α4 | 110–114 |
| α5 | 124–140 |
| α6 | 142–156 |
| α7 | 167–175 |
| α8a | 178–186 |
| α8b | 188–207 |
| α9a | 213–231 |
| α9b | 233–258 |

**Supplementary Table 2. *Salmonella* strains and plasmids used in this study.**

| **Strain or plasmid** | **Relevant characteristics** | **Reference or source** |
| --- | --- | --- |
| *Salmonella* |  |  |
| SJW1368 | ∆(*cheW-flhD*); master operon mutant | (1) |
| TH10551 | ∆*fliR* | Kelly T. Hughes |
| TH12991 | ∆*phoN* | Kelly T. Hughes |
|  |  |  |
| Plasmid |  |  |
| pBAD24 | Expression vector | (2) |
| pBAD24E | Modified pBAD24 | This study |
| pTrc99A | Expression vector | (3) |
| pTrc99AFF4 | Modified pTrc99A | (4) |
| pTrc99CES3 | Modified pTrc99A | This study |
| pTrc99ES | Modified pTrc99A | (5) |
| pKY069 | pTrc99AFF4/His-FliP1 | (6) |
| pKY070 | pTrc99AFF4/ FliO + His-FliP | (6) |
| pKY077 | pTrc99AFF4/ FliO + His-FliP + HA-FliQ + FliR-FLAG | (6) |
| pKY082 | pTrc99AFF4/ FliO + His-FliP(E178A) | (6) |
| pKY085 | pTrc99AFF4/ FliO + His-FliP(F150A) | (6) |
| pKY088 | pTrc99AFF4/ His-FliP + FliR-FLAG | (6) |
| pKY089 | pTrc99AFF4/ His-FliP + HA-FliQ + FliR-FLAG | (6) |
| pKY090 | pTrc99A/ His-FliP + HA-FliQ | This study |
| pMKM601 | pTrc99AFF4/HA-FliQ | This study |
| pMKM701 | pBAD24E/ FliR-His | (5) |
| pMKM701 | pBAD24E/ FliR(∆167–262)-His | This study |
| pMKM801 | pTrc99ES/ FliO + His-FliP + HA-FliQ + FliR-FLAG | This study |
| pMKM802 | pTrc99ES/ FliO + His-FliP + HA-FliQ + FliR(∆167–262)-FLAG | This study |
| pMKM10001 | pTrc99AFF4/ mPhoA | (7) |
| pMKM10002 | pTrc99AFF4/ prePhoA | (7) |
| pMKM10003 | pTrc99AFF4/ PhoA–FliQ(2-89) (indicated as Q1) | (7) |
| pMKM10018 | pTrc99AFF4 / FliP(1-21)-PhoA (indicated as P1) | This study |
| pMKM10019 | pTrc99AFF4/ FliP(1-80)–PhoA (indicated as P2) | This study |
| pMKM10020 | pTrc99AFF4/ FliP(1-161)–PhoA (indicated as P3) | This study |
| pMKM10021 | pTrc99AFF4/ FliP(1-208)–PhoA (indicated as P4) | This study |
| pMKM10022 | pTrc99AFF/ FliP(1-245)–PhoA (indicated as P5) | This study |
| pMKM10023 | pTrc99FFA/ FliQ(1-47)–PhoA (indicated as Q2) | This study |
| pMKM10024 | pTrc99A/ FliQ(1-89)–PhoA (indicated as Q3) | This study |
| pMKM10025 | pTrc99A/ PhoA–FliR(2-264) (indicated as R1) | This study |
| pMKM10026 | pTrc99A/ FliR(1-34)–PhoA (indicated as R2) | This study |
| pMKM10027 | pTrc99A/ FliR(1-64)–PhoA (indicated as R3) | This study |
| pMKM10028 | pTrc99A/ FliR(1-103)–PhoA (indicated as R4) | This study |
| pMKM10029 | pTrc99A/ FliR(1-169)–PhoA (indicated as R5) | This study |
| pMKM10030 | pTrc99A/ FliR(1-206)–PhoA (indicated as R6) | This study |
| pMKM10031 | pTrc99A/ FliR(1-264)–PhoA (indicated as R7) | This study |

1 A histidine (His) tag was inserted between Gln-22 and Leu-23 of FliP, and so the His tag is present at the N-terminus of mature FliP after the N-terminal signal peptide is cleaved.

**References**

1. Ohnishi, K., Ohto, Y., Aizawa, S., Macnab, R.M., and Iino, T. (1994). FlgD is a scaffolding protein needed for flagellar hook assembly in *Salmonella typhimurium*. J. Bacteriol. *176*, 2272–2281.
2. Guzman, L.M., Belin, D., Carson, M.J., and Beckwith, J. (1995). Tight regulation, modulation, and high-level expression by vectors containing the arabinose pBAD promoter. J. Bacteriol. *177*, 4121–4130.
3. Amann, E., Ochs, B., and Abel, K.J. (1988). Tightly regulated *tac* promoter vectors useful for the expression of unfused and fused proteins in *Escherichia coli*. Gene *69*, 301–315.
4. Ohnishi, K., Fan, F., Schoenhals, G.J., Kihara, M., and Macnab, R.M. (1997). The FliO, FliP, FliQ, and FliR proteins of *Salmonella typhimurium*: putative components for flagellar assembly. J. Bacteriol. *179*, 6092–6099.
5. Kinoshita, M., Miyata, T., Makino, F., Imada, K., Namba, K., and Minamino, T. (2025). A β-cap on the FliPQR protein-export channel acts as the cap for initial flagellar rod assembly. Proc. Natl. Acad. Sci. USA *122*, e2507221122.
6. Fukumura, T., Makino, F., Dietsche, T., Kinoshita, M., Kato, T., Wagner, S., Namba, K., Imada, K., and Minamino, T. **(**2017). Assembly and stoichiometry of the core structure of the bacterial flagellar type III export gate complex. PLoS Biol. *15*, e2002281.
7. Kinoshita, M., Namba, K., and Minamino, T. (2021). A positive charge region of *Salmonella* FliI is required for ATPase formation and efficient flagellar protein export. Commun. Biol. *4*, 464.
